# Supplementary material
Source: PubMed Central journal article supplement (PMC10061913)
Supplement: NIHMS1885877-supplement-Material_list.pdf [file NIHMS1885877-supplement-Material_list.pdf]

Materials List for

# Endothelial Cell Transcytosis Assay as an *In Vitro* Model to Evaluate Inner Blood-Retinal Barrier Permeability

Kiran Bora<sup>\*1</sup>, Zhongxiao Wang<sup>\*1</sup>, Felix Yemanyi<sup>1</sup>, Meenakshi Maurya<sup>1</sup>, Alexandra K. Blomfield<sup>1</sup>, Yohei Tomita<sup>1</sup>, Jing Chen<sup>1</sup>

<sup>1</sup>Department of Ophthalmology, Boston Children's Hospital, Harvard Medical School

\*These authors contributed equally

## Corresponding Author

Jing Chen

Jing.Chen@childrens.harvard.edu

## Citation

Bora, K., Wang, Z., Yemanyi, F., Maurya, M., Blomfield, A.K., Tomita, Y., Chen, J. Endothelial Cell Transcytosis Assay as an *In Vitro* Model to Evaluate Inner Blood-Retinal Barrier Permeability. *J. Vis. Exp.* (184), e64076, doi:10.3791/64076 (2022).

## Date Published

June 7, 2022

## DOI

10.3791/64076

## URL

jove.com/video/64076

## Materials

| Name                                                             | Company                                               | Catalog Number | Comments |
|------------------------------------------------------------------|-------------------------------------------------------|----------------|----------|
| Biological Safety Cabinet                                        | Thermo Electron Corporation, Thermo Fisher Scientific | 1286           |          |
| Cell culture petridish                                           | Nest Biotechnology                                    | 704001         |          |
| Centrifuge                                                       | Eppendorf                                             | 5702           |          |
| Centrifuge tubes (15 mL)                                         | Corning Inc.                                          | 352097         |          |
| Centrifuge tubes (50 mL)                                         | Denville Scientific Inc.                              | C1062-P        |          |
| Cyanine 3-human Transferrin                                      | Jackson ImmunoResearch                                | AB_2337082     |          |
| Endothelial Cell Basal Medium-2 (EBM-2)                          | Lonza Bioscience                                      | CC-3156        |          |
| Endothelial Cell Growth Medium-2 (EGM-2) SingleQuots supplements | Lonza Bioscience                                      | CC-4176        |          |
| EVOM Millicell Electrical Resistance System-2 (ERS-2)            | Millipore                                             | MERS00002      |          |
| Fetal Bovine Serum (FBS)                                         | Lonza Bioscience                                      | CC-4102B       |          |
| Gelatin                                                          | Sigma-Aldrich                                         | G7765          |          |
| Hemocytometer (2-chip)                                           | Bulldog Bio                                           | DHC-N002       |          |
| Horseradish Peroxidase (HRP)                                     | Sigma-Aldrich                                         | P8250          |          |
| Human retinal microvascular endothelial cells (HRMEC)            | Cell Systems                                          | ACBRI 181      |          |
| Incubator                                                        | Thermo Electron Corporation, Thermo Fisher Scientific | 3110           |          |
| L cells (for Control-conditioned medium)                         | ATCC                                                  | CRL-2648       |          |
| L Wnt-3A cells (for Wnt3A-conditioned medium)                    | ATCC                                                  | CRL-2647       |          |
| Light microscope                                                 | Leica                                                 | DMi1           |          |
| Multimode Plate Reader                                           | EnSight, PerkinElmer                                  |                |          |
| Phosphate-buffered saline (PBS) buffer (1x)                      | GIBCO                                                 | 10010-023      |          |

|                                                                                  |                                     |              |  |
|----------------------------------------------------------------------------------|-------------------------------------|--------------|--|
| QuantaBlu Fluorogenic Peroxidase Substrate kit                                   | Thermo Fisher Scientific            | 15169        |  |
| Recombinant human Norrin (rhNorrin)                                              | R&D Systems                         | 3014-NR      |  |
| Recombinant human Vascular endothelial growth factor (rhVEGF)                    | R&D Systems                         | 293-VE       |  |
| Syringe filter (0.22 $\mu$ m)                                                    | Millipore                           | SLGP033RS    |  |
| Transwell inserts (6.5 mm transwell, 0.4 $\mu$ m pore polyester membrane insert) | Corning Inc.                        | CLS3470-48EA |  |
| Trypsin-EDTA (0.25%) (1x)                                                        | GIBCO                               | 25-200-072   |  |
| Water bath                                                                       | Precision, Thermo Fisher Scientific | 51221060     |  |
| XAV939 (Wnt/ $\beta$ -catenin Inhibitor)                                         | Selleckchem                         | S1180        |  |
